# Supplementary material
Source: MDPI journal article supplement (https://www.mdpi.com/2073-4441/13/12/1616)
Supplement: s1 [file s1]

## **Supplemental Material**

# **Nearshore Fish Species Richness and Species-Habitat Associations in the St. Clair-Detroit River System**

**Corbin D. Hilling<sup>1†</sup>, Jason L. Fischer<sup>2</sup>, Jason Ross<sup>3</sup>, Taaja. R. Tucker<sup>4</sup>, Robin L. DeBruyne<sup>1</sup>, Christine M. Mayer<sup>1</sup> and Edward F. Roseman<sup>4</sup>**

1 University of Toledo, Department of Environmental Sciences, Toledo, OH, USA

2 U.S. Fish and Wildlife Service, Alpena Fish and Wildlife Conservation Office, Detroit River Sub-station, Trenton, MI, USA

3 U.S. Fish and Wildlife Service, Ashland Fish and Wildlife Conservation Office, Ashland, WI, USA

4 U.S. Geological Survey, Great Lakes Science Center, Ann Arbor, MI, USA

\*Correspondence: hillinc5@gmail.com; Tel.: +1-304-288-9336

†Present Address: U.S. Fish and Wildlife Service Maine Field Office, East Orland, ME, USA

Table S1. Number of each fish species collected during a shoreline seine survey at sites in the St. Clair-Detroit River System 2013–2019. Sites are arranged from upstream to downstream (left to right).

| Species                                            | S-001 | S-002 | S-003 | S-004 | S-005 | S-006 | S-007 | S-008 | S-009 | S-010 | Total |
|----------------------------------------------------|-------|-------|-------|-------|-------|-------|-------|-------|-------|-------|-------|
| Atherinopsidae                                     |       |       |       |       |       |       |       |       |       |       |       |
| Brook Silverside <i>Labidesthes sicculus</i>       | 0     | 0     | 397   | 91    | 132   | 227   | 131   | 160   | 398   | 569   | 2,105 |
| Catostomidae                                       |       |       |       |       |       |       |       |       |       |       |       |
| Northern hogsucker <i>Hypentelium nigricans</i>    | 0     | 0     | 0     | 8     | 66    | 0     | 2     | 60    | 0     | 0     | 136   |
| Quillback <i>Carpriodes cyprinus</i>               | 0     | 0     | 0     | 0     | 0     | 0     | 11    | 0     | 0     | 9     | 20    |
| Golden redhorse <i>Moxostoma erythrurum</i>        | 0     | 0     | 0     | 0     | 2     | 0     | 0     | 0     | 0     | 0     | 2     |
| Shorthead redhorse <i>Moxostoma macrolepidotum</i> | 0     | 0     | 4     | 0     | 0     | 0     | 0     | 0     | 0     | 0     | 4     |
| Silver redhorse <i>Moxostoma anisurum</i>          | 0     | 0     | 0     | 0     | 0     | 0     | 0     | 1     | 0     | 0     | 1     |
| Spotted sucker <i>Minytrema melanops</i>           | 0     | 0     | 0     | 0     | 0     | 0     | 0     | 8     | 7     | 0     | 15    |
| White sucker <i>Catostomus commersonii</i>         | 0     | 0     | 0     | 0     | 0     | 1     | 0     | 12    | 45    | 0     | 58    |
| Lake chubsucker <i>Erimyzon succetta</i>           | 0     | 0     | 0     | 0     | 0     | 9     | 0     | 0     | 0     | 0     | 9     |
| Centrarchidae                                      |       |       |       |       |       |       |       |       |       |       |       |
| Black crappie <i>Pomoxis nigromaculatus</i>        | 0     | 0     | 0     | 0     | 0     | 1     | 0     | 0     | 1     | 0     | 2     |
| Bluegill <i>Lepomis macrochirus</i>                | 0     | 0     | 0     | 0     | 0     | 5     | 0     | 0     | 166   | 238   | 409   |
| Green sunfish <i>Lepomis cyanellus</i>             | 0     | 0     | 0     | 0     | 0     | 0     | 0     | 1     | 14    | 0     | 15    |
| Largemouth bass <i>Micropterus salmoides</i>       | 0     | 0     | 0     | 2     | 1     | 44    | 0     | 18    | 178   | 79    | 322   |
| Northern sunfish <i>Lepomis megalotis</i>          | 0     | 0     | 0     | 0     | 0     | 0     | 0     | 0     | 148   | 0     | 148   |
| Pumpkinseed sunfish <i>Lepomis gibbosus</i>        | 0     | 0     | 0     | 0     | 0     | 27    | 0     | 1     | 66    | 84    | 178   |
| Rock bass <i>Ambloplites rupestris</i>             | 0     | 0     | 1     | 0     | 0     | 12    | 2     | 84    | 513   | 6     | 618   |
| Smallmouth bass <i>Micropterus dolomieu</i>        | 0     | 0     | 9     | 0     | 9     | 0     | 67    | 22    | 1     | 2     | 110   |
| Clupeidae                                          |       |       |       |       |       |       |       |       |       |       |       |
| Alewife <i>Alosa pseudoharengus</i>                | 2     | 0     | 0     | 0     | 0     | 1     | 0     | 0     | 0     | 4     | 7     |
| Gizzard shad <i>Dorosoma cepedianum</i>            | 0     | 0     | 0     | 0     | 3     | 0     | 0     | 9     | 12    | 3     | 27    |
| Cyprinidae                                         |       |       |       |       |       |       |       |       |       |       |       |
| Goldfish <i>Carassius auratus</i>                  | 0     | 0     | 0     | 0     | 0     | 0     | 0     | 0     | 147   | 0     | 147   |

Table 2 Continued

|                                               |     |     |       |       |     |       |     |     |     |       |        |
|-----------------------------------------------|-----|-----|-------|-------|-----|-------|-----|-----|-----|-------|--------|
| Common carp <i>Cyprinus carpio</i>            | 0   | 0   | 0     | 0     | 0   | 0     | 0   | 0   | 1   | 0     | 1      |
| Esocidae                                      |     |     |       |       |     |       |     |     |     |       |        |
| Grass pickerel <i>Esox americanus</i>         | 0   | 0   | 0     | 0     | 0   | 2     | 0   | 0   | 0   | 0     | 2      |
| Muskellunge <i>Esox masquinongy</i>           | 0   | 0   | 0     | 0     | 0   | 0     | 0   | 2   | 1   | 0     | 3      |
| Northern pike <i>Esox lucius</i>              | 0   | 0   | 0     | 0     | 0   | 1     | 0   | 0   | 0   | 0     | 1      |
| Fundulidae                                    |     |     |       |       |     |       |     |     |     |       |        |
| Banded killifish <i>Fundulus diaphanus</i>    | 0   | 0   | 0     | 0     | 0   | 293   | 2   | 6   | 24  | 199   | 524    |
| Gobiidae                                      |     |     |       |       |     |       |     |     |     |       |        |
| Round goby <i>Neogobius melanostomus</i>      | 11  | 4   | 211   | 13    | 101 | 23    | 141 | 314 | 380 | 718   | 1,916  |
| Tubenose goby <i>Proterorhinus marmoratus</i> | 0   | 0   | 153   | 2     | 7   | 303   | 20  | 18  | 31  | 92    | 626    |
| Ictaluridae                                   |     |     |       |       |     |       |     |     |     |       |        |
| Black bullhead <i>Ameiurus melas</i>          | 0   | 0   | 0     | 0     | 0   | 1     | 0   | 0   | 3   | 0     | 4      |
| Brown bullhead <i>Ameiurus nebulosus</i>      | 0   | 0   | 0     | 0     | 0   | 0     | 0   | 0   | 2   | 0     | 2      |
| Channel catfish <i>Ictalurus punctatus</i>    | 0   | 0   | 0     | 0     | 0   | 0     | 0   | 0   | 0   | 7     | 7      |
| Tadpole madtom <i>Noturus gyrinus</i>         | 0   | 0   | 0     | 0     | 0   | 2     | 0   | 0   | 0   | 7     | 9      |
| Yellow bullhead <i>Ameiurus natalis</i>       | 0   | 0   | 0     | 0     | 0   | 2     | 0   | 0   | 2   | 0     | 4      |
| Leuciscidae                                   |     |     |       |       |     |       |     |     |     |       |        |
| Blackchin shiner <i>Notropis heterodon</i>    | 0   | 0   | 65    | 3     | 0   | 57    | 0   | 3   | 0   | 0     | 128    |
| Blacknose shiner <i>Notropis heterolepis</i>  | 0   | 0   | 0     | 2     | 0   | 993   | 0   | 0   | 0   | 0     | 995    |
| Bluntnose minnow <i>Pimephales notatus</i>    | 0   | 0   | 18    | 1     | 0   | 1,486 | 7   | 566 | 759 | 1,356 | 4193   |
| Emerald shiner <i>Notropis atherinoides</i>   | 862 | 436 | 9,321 | 267   | 435 | 0     | 70  | 62  | 26  | 189   | 11,668 |
| Ghost shiner <i>Notropis buchanani</i>        | 0   | 0   | 0     | 0     | 0   | 0     | 1   | 0   | 18  | 0     | 19     |
| Golden shiner <i>Notemigonus crysoleucas</i>  | 0   | 0   | 0     | 0     | 0   | 0     | 2   | 1   | 5   | 0     | 8      |
| Hornyhead chub <i>Nocomis biguttatus</i>      | 0   | 0   | 4     | 1     | 1   | 15    | 0   | 98  | 5   | 0     | 124    |
| Longnose dace <i>Rhinichthys cataractae</i>   | 0   | 0   | 1     | 0     | 2   | 0     | 0   | 0   | 0   | 0     | 3      |
| Mimic shiner <i>Notropis volucellus</i>       | 9   | 8   | 0     | 51    | 0   | 0     | 22  | 4   | 1   | 72    | 167    |
| Pugnose minnow <i>Opsopoeodus emiliae</i>     | 0   | 0   | 0     | 0     | 0   | 61    | 0   | 1   | 1   | 0     | 63     |
| Pugnose shiner <i>Notropis anogenus</i>       | 0   | 0   | 0     | 0     | 0   | 614   | 0   | 0   | 0   | 0     | 614    |
| Sand shiner <i>Notropis stramineus</i>        | 256 | 4   | 39    | 57    | 228 | 20    | 395 | 33  | 0   | 21    | 1,053  |
| Spotfin shiner <i>Cyprinella spiloptera</i>   | 6   | 0   | 25    | 0     | 6   | 34    | 94  | 3   | 2   | 212   | 382    |
| Spottail shiner <i>Notropis hudsonius</i>     | 14  | 11  | 439   | 1,014 | 201 | 84    | 2   | 7   | 1   | 26    | 1,799  |

Table 2 Continued

|                                              |       |     |        |       |       |       |     |       |       |       |        |
|----------------------------------------------|-------|-----|--------|-------|-------|-------|-----|-------|-------|-------|--------|
| Striped shiner <i>Luxilus chrysocephalus</i> | 0     | 0   | 0      | 0     | 0     | 0     | 6   | 311   | 9     | 2     | 328    |
| Lepisosteidae                                |       |     |        |       |       |       |     |       |       |       |        |
| Longnose gar <i>Lepisosteus osseus</i>       | 0     | 0   | 0      | 0     | 0     | 0     | 0   | 0     | 0     | 1     | 1      |
| Moronidae                                    |       |     |        |       |       |       |     |       |       |       |        |
| White bass <i>Morone chrysops</i>            | 1     | 0   | 4      | 1     | 2     | 0     | 0   | 0     | 0     | 0     | 8      |
| White perch <i>Morone americana</i>          | 15    | 0   | 28     | 9     | 0     | 0     | 0   | 4     | 20    | 0     | 76     |
| Osmeridae                                    |       |     |        |       |       |       |     |       |       |       |        |
| Rainbow smelt <i>Osmerus mordax</i>          | 1     | 0   | 0      | 0     | 0     | 0     | 0   | 0     | 0     | 0     | 1      |
| Percidae                                     |       |     |        |       |       |       |     |       |       |       |        |
| Johnny darter <i>Etheostoma nigrum</i>       | 0     | 0   | 0      | 0     | 0     | 14    | 0   | 10    | 0     | 0     | 24     |
| Least darter <i>Etheostoma microperca</i>    | 0     | 0   | 0      | 0     | 0     | 52    | 0   | 1     | 1     | 3     | 57     |
| Logperch <i>Percina carprodes</i>            | 0     | 2   | 93     | 1     | 16    | 0     | 1   | 102   | 14    | 183   | 412    |
| Rainbow darter <i>Etheostoma caeruleum</i>   | 0     | 0   | 0      | 0     | 0     | 0     | 0   | 2     | 0     | 0     | 2      |
| Walleye <i>Sander vitreus</i>                | 0     | 0   | 0      | 0     | 0     | 0     | 0   | 0     | 0     | 1     | 1      |
| Yellow perch <i>Perca flavescens</i>         | 1     | 1   | 80     | 11    | 64    | 728   | 22  | 21    | 349   | 36    | 1,313  |
| Salmonidae                                   |       |     |        |       |       |       |     |       |       |       |        |
| Brown trout <i>Salmo trutta</i>              | 0     | 2   | 0      | 0     | 0     | 0     | 0   | 0     | 0     | 0     | 2      |
| Total                                        | 1,178 | 468 | 10,892 | 1,534 | 1,276 | 5,112 | 998 | 1,945 | 3,351 | 4,119 | 30,873 |

Table S2. Model selection results and model-averaged slope parameter estimates based on 256 candidate generalized linear mixed models to understand habitat associations of 33 fishes in the St. Clair and Detroit rivers based on a shoreline seine survey from 10 sites sampled 2013–2019. Column headings are predictor variables. Values in predictor variable columns are model-averaged slope parameters (unconditional SE in parentheses). Bolded model-averaged slope parameters indicated a significant difference from zero based on lacking overlap with zero of 95% confidence intervals. Values with an asterisk denote presence of a predictor variable in the best AICc-selected model. Grassy/Woody Shoreline represent levels of the predictor variable “Shoreline Vegetation Type” and High/Low Veg. Rich. represent levels of “Aquatic Macrophyte Richness.” In both cases “None” was estimated as part of the model intercept.

| Species            | In-river substrate |                               |                               |                               |                               |                                | Shoreline vegetation type       |                                 | Aquatic macrophyte richness    |                              |                              |
|--------------------|--------------------|-------------------------------|-------------------------------|-------------------------------|-------------------------------|--------------------------------|---------------------------------|---------------------------------|--------------------------------|------------------------------|------------------------------|
|                    | Silt               | Sand                          | Gravel                        | Cobble                        | Organic                       | Algae                          | Grassy                          | Mixed                           | Woody                          | High                         | Low                          |
| Atherinopsidae     |                    |                               |                               |                               |                               |                                |                                 |                                 |                                |                              |                              |
| Brook Silverside   | -0.38 (0.58)       | <b>-1.93 (0.64)*</b>          | <b>-2.55 (0.66)*</b>          | -0.46 (0.61)                  | -0.03 (0.55)                  | -7.57 (2.75x10 <sup>3</sup> )  | 0.21 (0.77)                     | -7.59 (2.25x10 <sup>4</sup> )   | 0.46 (1.03)                    | -0.20 (0.48)                 | 0.05 (0.25)                  |
| Catostomidae       |                    |                               |                               |                               |                               |                                |                                 |                                 |                                |                              |                              |
| Northern hogsucker | -0.56 (0.97)       | -0.12 (0.63)                  | 0 (0.44)                      | 0.15 (0.63)                   | -6.70 (3.79x10 <sup>5</sup> ) | -1.91 (7.61x10 <sup>5</sup> )  | 0.28 (1.11)                     | -2.29 (2.45x10 <sup>4</sup> )   | 0.51 (1.54)                    | -0.07 (0.42)                 | -0.04 (0.25)                 |
| Spotted sucker     | 1.05 (0.76)        | -1.08 (728.78)                | -3.6 (728.78)                 | -0.96 (2.48x10 <sup>5</sup> ) | 1.63 (728.78)*                | -0.61 (2.52x10 <sup>6</sup> )  | -8.23 (1.99x10 <sup>6</sup> )*  | -6.85 (2.04x10 <sup>6</sup> )*  | 38.66 (6.64x10 <sup>4</sup> )* | <b>-7.37 (1.23)*</b>         | <b>-6.23 (1.12)*</b>         |
| White sucker       | -0.01 (0.77)       | 0.42 (6.54x10 <sup>4</sup> )  | 0.38 (6.54x10 <sup>4</sup> )  | -0.91 (3.81x10 <sup>5</sup> ) | 0.60 (6.54x10 <sup>4</sup> )  | 28.05 (2.10x10 <sup>6</sup> )* | -3.94 (2.10x10 <sup>6</sup> )*  | -5.01 (3.28x10 <sup>6</sup> )*  | 23.31 (4.20x10 <sup>4</sup> )* | 2.24 (1.11x10 <sup>5</sup> ) | 2.37 (1.11x10 <sup>5</sup> ) |
| Centrarchidae      |                    |                               |                               |                               |                               |                                |                                 |                                 |                                |                              |                              |
| Bluegill           | -0.32 (0.68)       | 2.67 (8.20x10 <sup>4</sup> )* | -5.21 (1.08x10 <sup>6</sup> ) | -1.89 (1.35x10 <sup>4</sup> ) | 0.02 (8.20x10 <sup>4</sup> )  | 0.16 (8.20x10 <sup>4</sup> )   | 1.22 (1.46x10 <sup>3</sup> )    | -0.37 (5.18x10 <sup>5</sup> )   | 1.28 (1.46x10 <sup>3</sup> )   | <b>4.58 (1.03)*</b>          | <b>2.92 (1.24)*</b>          |
| Green sunfish      | 0.49 (0.44)        | -0.42 (277.19)                | -0.01 (277.19)                | -1.95 (2.47x10 <sup>5</sup> ) | 0.32 (277.19)*                | -0.85 (1.26x10 <sup>6</sup> )  | -12.62 (6.28x10 <sup>6</sup> )* | -2.74 (1.47x10 <sup>5</sup> )*  | 20.25 (9.79x10 <sup>3</sup> )* | 4.38 (1.90x10 <sup>5</sup> ) | 4.44 (1.90x10 <sup>5</sup> ) |
| Largemouth bass    | -0.4 (0.36)*       | 0.21 (0.98)                   | 0.38 (0.86)                   | <b>3.44 (1.56)*</b>           | 0.59 (0.94)                   | <b>2.47 (0.82)*</b>            | 3.89 (2.32)*                    | -11.14 (5.45x10 <sup>3</sup> )* | <b>6.59 (2.93)*</b>            | -0.05 (0.19)                 | -0.03 (0.18)                 |

Table 2 Continued

| Species          | In-river substrate |                              |                                 |                                |                               | Shoreline vegetation type       |                                |                                |                                | Aquatic macrophyte richness   |                               |
|------------------|--------------------|------------------------------|---------------------------------|--------------------------------|-------------------------------|---------------------------------|--------------------------------|--------------------------------|--------------------------------|-------------------------------|-------------------------------|
|                  | Silt               | Sand                         | Gravel                          | Cobble                         | Organic                       | Algae                           | Grassy                         | Mixed                          | Woody                          | High                          | Low                           |
| Northern sunfish | -1.78 (3.19)       | 0.46 (1.03x10 <sup>5</sup> ) | -7.26 (5.92x10 <sup>5</sup> )   | -5.17 (5.43x10 <sup>4</sup> )  | 1.13 (1.03x10 <sup>5</sup> )  | -0.45 (1.20x10 <sup>6</sup> )   | -2.06 (1.20x10 <sup>6</sup> )  | -0.14 (5.93x10 <sup>4</sup> )  | 2.73 (3.53x10 <sup>3</sup> )   | 2.62 (2.26x10 <sup>5</sup> )  | 3.06 (2.26x10 <sup>5</sup> )  |
| Pumpkinseed      | 0.21 (0.55)        | 0.02 (655.93)                | -0.11 (655.93)                  | -4.28 (1.74x10 <sup>4</sup> )  | -0.23 (655.93)                | 1.12 (655.93)*                  | 5.61 (3.40x10 <sup>4</sup> )   | -1.28 (2.84x10 <sup>5</sup> )  | 5.83 (3.40x10 <sup>4</sup> )   | <b>3.77 (0.94)*</b>           | <b>2.86 (1.05)*</b>           |
| Rock bass        | -0.11 (0.37)       | -0.13 (0.35)*                | 0.63 (0.69)                     | 0.83 (1.05)                    | 0.07 (0.51)                   | <b>4.49 (1.44)*</b>             | 2.70 (1.48)*                   | -15.22 (4.0x10 <sup>4</sup> )* | <b>7.63 (1.49)*</b>            | 0.00 (0.26)                   | 0.01 (0.27)                   |
| Smallmouth bass  | -0.31 (0.76)       | 1.08 (0.86)*                 | -0.08 (0.40)                    | 0.18 (0.61)                    | -0.36 (1.01)                  | -4.06 (7.56x10 <sup>5</sup> )   | 0.51 (1.05)                    | -4.58 (9.93x10 <sup>4</sup> )  | 0.68 (1.33)                    | 0.41 (0.85)*                  | 1.02 (0.81)*                  |
| Clupeidae        |                    |                              |                                 |                                |                               |                                 |                                |                                |                                |                               |                               |
| Gizzard shad     | -0.18 (0.43)       | 4.00 (3.85x10 <sup>4</sup> ) | -15.00 (1.25x10 <sup>5</sup> )* | 12.75 (3.82x10 <sup>2</sup> )* | 5.26 (3.85x10 <sup>4</sup> )* | -2.59 (1.46x10 <sup>5</sup> )   | 52.45 (2.63x10 <sup>4</sup> )* | -5.45 (3.46x10 <sup>6</sup> )* | 60.88 (4.64x10 <sup>4</sup> )* | -6.21 (3.82x10 <sup>4</sup> ) | -6.22 (3.82x10 <sup>4</sup> ) |
| Cyprinidae       |                    |                              |                                 |                                |                               |                                 |                                |                                |                                |                               |                               |
| Goldfish         | -0.04 (0.90)       | 0.46 (2.21x10 <sup>4</sup> ) | -4.55 (9.39x10 <sup>3</sup> )   | -5.33 (5.57x10 <sup>5</sup> )  | 0.08 (2.21x10 <sup>4</sup> )  | -3.83 (2.77x10 <sup>5</sup> )   | -1.39 (2.79x10 <sup>5</sup> )  | -0.32 (6.03x10 <sup>4</sup> )  | 1.54 (792.65)                  | 7.18 (1.21x10 <sup>4</sup> )  | 7.14 (1.21x10 <sup>5</sup> )  |
| Gobiidae         |                    |                              |                                 |                                |                               |                                 |                                |                                |                                |                               |                               |
| Round goby       | -0.15 (0.37)       | 0.47 (0.52)*                 | 0.01 (0.29)                     | 0.57 (0.5)*                    | 0.05 (0.39)                   | -11.74 (3.15x10 <sup>3</sup> )* | 0.97 (0.89)*                   | -0.58 (1.25)*                  | 1.92 (1.33)*                   | -0.23 (0.44)                  | -0.22 (0.35)                  |
| Tubenose goby    | -0.13 (0.47)       | 0.29 (0.81)                  | -0.08 (0.51)                    | <b>3.79 (0.99)*</b>            | 0.52 (0.77)                   | 0.26 (0.98)                     | 1.79 (1.36)*                   | -9.88 (4.40x10 <sup>3</sup> )* | 1.54 (1.41)*                   | <b>2.66 (0.93)*</b>           | <b>1.67 (0.65)*</b>           |
| Fundulidae       |                    |                              |                                 |                                |                               |                                 |                                |                                |                                |                               |                               |
| Banded killifish | -0.73 (0.81)       | -2.13 (130.85)*              | -0.12 (130.85)                  | -2.68 (1.31x10 <sup>4</sup> )  | -0.13 (130.85)                | -0.12 (130.85)                  | 21.11 (6.28x10 <sup>3</sup> )* | -8.5 (2.58x10 <sup>6</sup> )*  | 20.16 (6.28x10 <sup>3</sup> )* | <b>1.44 (0.62)*</b>           | <b>1.63 (0.69)*</b>           |

Table 2 Continued

| Species          | In-river substrate              |                                   |                                   |                                    |                                  |                                  | Shoreline vegetation type          |                                 |                                    | Aquatic macrophyte richness       |                                    |
|------------------|---------------------------------|-----------------------------------|-----------------------------------|------------------------------------|----------------------------------|----------------------------------|------------------------------------|---------------------------------|------------------------------------|-----------------------------------|------------------------------------|
|                  | Silt                            | Sand                              | Gravel                            | Cobble                             | Organic                          | Algae                            | Grassy                             | Mixed                           | Woody                              | High                              | Low                                |
| Leuciscidae      |                                 |                                   |                                   |                                    |                                  |                                  |                                    |                                 |                                    |                                   |                                    |
| Blackchin shiner | 1.74<br>(308.31)*               | -1.73<br>(308.31)                 | 13.24<br>(5.04x10 <sup>4</sup> )* | -0.54<br>(308.31)*                 | -0.33<br>(2.96)*                 | 1.98 (2.56)                      | -13.58<br>(1.11x10 <sup>5</sup> )* | -20.02 (3.82x10 <sup>6</sup> )* | -23.68<br>(1.22x10 <sup>5</sup> )* | 58.84<br>(4.81x10 <sup>5</sup> )* | 34.22<br>(4.70x10 <sup>5</sup> )*  |
| Blacknose shiner | 0.19<br>(1.34x10 <sup>3</sup> ) | 0.23<br>(3.39x10 <sup>5</sup> )   | -7.27<br>(3.20x10 <sup>6</sup> )  | -11.63<br>(1.44x10 <sup>6</sup> )* | 0.30<br>(3.38x10 <sup>4</sup> )  | -0.04<br>(3.38x10 <sup>4</sup> ) | -0.13<br>(1.34x10 <sup>3</sup> )   | -0.53 (6.28x10 <sup>5</sup> )   | -1.17<br>(4.38x10 <sup>5</sup> )   | 13.92<br>(1.51x10 <sup>5</sup> )* | 14.07<br>(1.51x10 <sup>5</sup> )*  |
| Bluntnose minnow | 0.09 (0.37)                     | -5.62<br>(5.83x10 <sup>3</sup> )* | -3.43<br>(5.83x10 <sup>3</sup> )  | -10.72<br>(9.69x10 <sup>3</sup> )* | -3.71<br>(5.83x10 <sup>3</sup> ) | 3.42<br>(5.83x10 <sup>3</sup> )  | 3.03 (1.87)*                       | -14.73 (2.96x10 <sup>5</sup> )* | 4.35<br>(2.31)*                    | 0.57<br>(0.58)*                   | 0.88 (0.59)*                       |
| Emerald shiner   | 0.57 (0.90)                     | <b>-2.03</b><br><b>(0.66)*</b>    | -0.26 (0.64)*                     | <b>3.41 (0.79)*</b>                | -1.70<br>(1.10)*                 | -3.10<br>(2.52x10 <sup>3</sup> ) | <b>-1.47 (0.70)*</b>               | 1.05 (1.00)*                    | -1.61<br>(0.89)*                   | <b>-3.09</b><br><b>(0.79)*</b>    | 0.10 (0.63)*                       |
| Hornyhead chub   | 0.51 (0.58)*                    | <b>-3.55</b><br><b>(1.08)*</b>    | -0.36 (0.98)                      | <b>4.6 (0.92)*</b>                 | <b>-3.96</b><br><b>(1.14)*</b>   | <b>7.25 (1.66)*</b>              | 0.97 (0.72)*                       | -13.94 (5.92x10 <sup>3</sup> )* | <b>2.58</b><br><b>(0.90)*</b>      | <b>4.15</b><br><b>(1.02)*</b>     | 1.72 (0.98)*                       |
| Mimic shiner     | 0.28 (1.03)                     | -1.47<br>(1.61)*                  | 1.01 (1.13)                       | 0.69 (1.29)                        | 0.99 (1.57)                      | -3.85<br>(4.31x10 <sup>3</sup> ) | 0.02 (0.50)                        | 0.08 (0.75)                     | 0.00<br>(0.58)                     | 0.22<br>(0.78)                    | 0.14 (0.66)                        |
| Pugnose minnow   | 0.28 (0.95)                     | -1.13<br>(956.35)*                | -0.35 (956.35)                    | -4.08<br>(3.88x10 <sup>4</sup> )   | 0.33<br>(956.35)                 | 5.46<br>(956.35)*                | 2.9 (8.0x10 <sup>3</sup> )         | -0.6 (2.32x10 <sup>5</sup> )    | 2.9<br>(8.0x10 <sup>3</sup> )      | 0.12<br>(0.81)                    | -0.03 (0.64)                       |
| Pugnose shiner   | 0.35 (1.12)                     | 0.68<br>(6.34x10 <sup>4</sup> )   | -3.77<br>(2.76x10 <sup>3</sup> )  | -2 (1.54x10 <sup>5</sup> )         | 1.32<br>(6.34x10 <sup>4</sup> )  | 1.52<br>(6.34x10 <sup>4</sup> )* | 0.29 (774.64)                      | -0.21 (3.54x10 <sup>4</sup> )   | -0.56<br>(3.80x10 <sup>5</sup> )   | 14.01<br>(4.20x10 <sup>3</sup> )* | -19.98<br>(6.18x10 <sup>6</sup> )* |
| Sand shiner      | <b>-3.12 (0.98)*</b>            | -0.13 (0.49)                      | 0.11 (0.39)                       | -0.46 (0.7)                        | <b>-5.1 (1.5)*</b>               | -1.51<br>(1.54x10 <sup>3</sup> ) | <b>2.02 (0.64)*</b>                | -1.26 (1.03)*                   | -2.26<br>(1.46)*                   | 1.69<br>(1.19)*                   | -0.31 (0.5)*                       |
| Spotfin shiner   | -0.25 (0.82)                    | <b>-2.39</b><br><b>(1.13)*</b>    | 0.37 (0.68)                       | <b>2.72 (1.02)*</b>                | <b>3.22</b><br><b>(1.35)*</b>    | -7.28<br>(8.91x10 <sup>4</sup> ) | 0.96 (1.35)                        | -7.01 (9.33x10 <sup>4</sup> )   | -0.12<br>(1.11)                    | -0.19<br>(0.55)                   | -0.09 (0.38)                       |
| Spottail shiner  | 1.78 (1.10)*                    | <b>-2.3 (0.92)*</b>               | 0.67 (0.76)*                      | 0.06 (0.52)                        | -0.43 (1.00)                     | 0.62 (1.65)                      | -0.22 (0.90)                       | -0.67 (1.49)                    | -1.39<br>(1.98)                    | -1.29<br>(1.13)*                  | 0.95 (0.71)*                       |
| Striped shiner   | 0.00 (0.64)                     | -1.47<br>(774.45)                 | -0.77 (774.45)                    | -3.01<br>(2.65x10 <sup>5</sup> )   | -1.44<br>(774.45)                | -2.13<br>(8.45x10 <sup>4</sup> ) | 24.49<br>(2.61x10 <sup>4</sup> )   | -9.91 (6.02x10 <sup>6</sup> )*  | 28.02<br>(2.61x10 <sup>4</sup> )*  | 0.13<br>(0.44)*                   | 0.06 (0.31)                        |

Table 2 Continued

| Species       | In-river substrate                 |                                   |                                  |                                  |                                  | Shoreline vegetation type         |                                    |                                 |                                 | Aquatic macrophyte richness |                      |
|---------------|------------------------------------|-----------------------------------|----------------------------------|----------------------------------|----------------------------------|-----------------------------------|------------------------------------|---------------------------------|---------------------------------|-----------------------------|----------------------|
|               | Silt                               | Sand                              | Gravel                           | Cobble                           | Organic                          | Algae                             | Grassy                             | Mixed                           | Woody                           | High                        | Low                  |
| Moronidae     |                                    |                                   |                                  |                                  |                                  |                                   |                                    |                                 |                                 |                             |                      |
| White perch   | -0.17 (0.59)                       | <b>2.41 (0.45)*</b>               | -0.22 (0.34)                     | 0.5 (0.38)                       | 0.16 (0.37)                      | -0.63<br>(1.92x10 <sup>5</sup> )  | -34.23<br>(1.53x10 <sup>6</sup> )* | -50.03 (4.18x10 <sup>5</sup> )* | <b>2.19<br/>(0.42)*</b>         | <b>-1.31<br/>(0.65)*</b>    | 0.33 (0.36)*         |
| Percidae      |                                    |                                   |                                  |                                  |                                  |                                   |                                    |                                 |                                 |                             |                      |
| Johnny darter | -14.29<br>(6.13x10 <sup>5</sup> )* | -1.38<br>(2.06x10 <sup>4</sup> )  | -0.25<br>(2.06x10 <sup>4</sup> ) | -3.54<br>(2.89x10 <sup>4</sup> ) | -0.09<br>(2.06x10 <sup>4</sup> ) | -10.07<br>(8.68x10 <sup>4</sup> ) | 4.31<br>(1.83x10 <sup>5</sup> )    | -0.45 (2.59x10 <sup>6</sup> )   | 4.54<br>(1.83x10 <sup>5</sup> ) | 1.18<br>(2.47)              | -0.61 (1.74)         |
| Least darter  | 3.5 (2.88)*                        | -3.88<br>(2.92x10 <sup>4</sup> )* | -1.34<br>(2.92x10 <sup>4</sup> ) | -4.01<br>(2.30x10 <sup>4</sup> ) | -0.95<br>(2.92x10 <sup>4</sup> ) | -12.11<br>(1.14x10 <sup>7</sup> ) | 7.2<br>(2.87x10 <sup>4</sup> )     | -1.37 (319x10 <sup>6</sup> )    | 6.69<br>(2.87x10 <sup>4</sup> ) | 13.91<br>(212400)           | 13.63<br>(212400)    |
| Logperch      | -0.11 (0.42)                       | 0.06 (0.38)                       | -0.29 (0.5)                      | 0.03 (0.37)                      | 0.28 (0.59)                      | -2.57<br>(4.15x10 <sup>4</sup> )  | 0.1 (0.74)                         | 0.08 (1.06)                     | 0.43<br>(1.33)                  | -0.95<br>(0.69)*            | -0.09 (0.45)*        |
| Yellow perch  | -1.7 (0.88)*                       | 0.29 (0.57)                       | -0.23 (0.37)                     | <b>1.61 (0.68)*</b>              | <b>-2.65<br/>(1.12)*</b>         | <b>3.2 (1.5)*</b>                 | 1.84 (1.87)*                       | -0.77 (2.16)*                   | 2.51<br>(2.42)*                 | <b>-1.54<br/>(0.61)*</b>    | <b>-1.38 (0.48)*</b> |
